# Supplementary material for: Polish translation and validation of the Pelvic Organ Prolapse/Urinary Incontinence Sexual Questionnaire, IUGA-Revised (PISQ-IR)
Source: Springer Nature journal article supplement (doi:10.1007/s00192-017-3539-5), 2017-12-29
Supplement: MOESM1 [file 16443934]

**Kwestionariusz PISQ-IR:  
Seksualne Funkcjonowanie Kobiet z Wypadaniem Narządów  
Miednicy Mniejszej, Nietrzymaniem Moczu i/lub  
Nietrzymaniem Stolca**

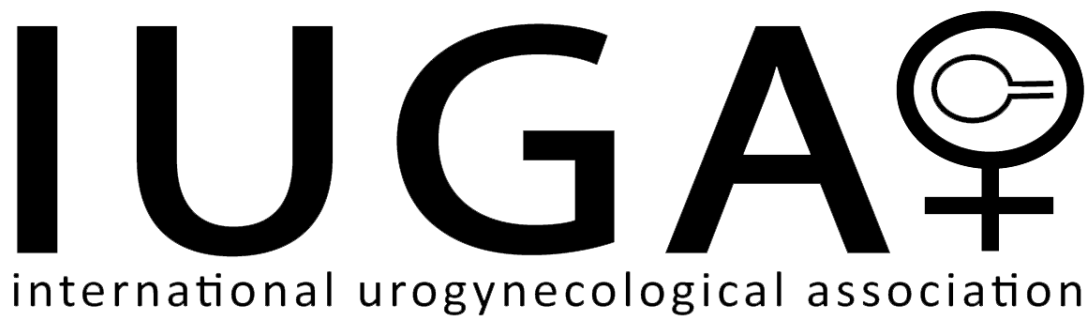

Inicjały : \_\_ \_\_

Data urodzenia: \_\_ / \_\_ / \_\_\_\_

Data wypełnienia kwestionariusza: \_\_ / \_\_ / \_\_\_\_

**Pytanie 1.** Które z poniższych najlepiej Panią opisuje:

całkowicie nieaktywna seksualnie

1  → Proszę przejść do Pytania 2  
– **Sekcja 1: Brak Aktywności Seksualnej**

aktywna seksualnie z lub bez partnera

2  → Proszę przejść do Pytania 7  
– **Sekcja 2: Aktywność Seksualna**

### SEKCJA 1: BRAK AKTYWNOŚCI SEKSUALNEJ

Jeśli jest Pani aktywna seksualnie proszę zaznaczyć tę rubrykę  i przejść do **Sekcji 2** na stronie 3.

**Pytanie 2.** Poniżej znajduje się lista powodów, dla których może Pani być nieaktywna seksualnie. Proszę przy każdym zaznaczyć do jakiego stopnia się Pani zgadza lub nie zgadza z opinią, że to jest powód Pani braku aktywności seksualnej.

|                                                                                                                                                                    | Zdecydowanie się zgadzam   | Raczej się zgadzam         | Raczej się <u>nie</u> zgadzam | Zdecydowanie się <u>nie</u> zgadzam |
|--------------------------------------------------------------------------------------------------------------------------------------------------------------------|----------------------------|----------------------------|-------------------------------|-------------------------------------|
| a. Brak partnera                                                                                                                                                   | <input type="checkbox"/> 1 | <input type="checkbox"/> 2 | <input type="checkbox"/> 3    | <input type="checkbox"/> 4          |
| b. Brak zainteresowania                                                                                                                                            | <input type="checkbox"/> 1 | <input type="checkbox"/> 2 | <input type="checkbox"/> 3    | <input type="checkbox"/> 4          |
| c. Z powodu problemów z pęcherzem moczowym i jelitami (nietrzymanie moczu lub stolca) lub z powodu obniżenia narządów płciowych (uczucie „wybrzuszenia” w pochwie) | <input type="checkbox"/> 1 | <input type="checkbox"/> 2 | <input type="checkbox"/> 3    | <input type="checkbox"/> 4          |
| d. Inne moje problemy zdrowotne                                                                                                                                    | <input type="checkbox"/> 1 | <input type="checkbox"/> 2 | <input type="checkbox"/> 3    | <input type="checkbox"/> 4          |
| e. Ból                                                                                                                                                             | <input type="checkbox"/> 1 | <input type="checkbox"/> 2 | <input type="checkbox"/> 3    | <input type="checkbox"/> 4          |

**Pytanie 3.** Do jakiego stopnia **obawa** przed nietrzymaniem moczu i/lub stolca i/lub uczuciem „wybrzuszenia” w pochwie (obniżenia pęcherza moczowego, odbytnicy, wypadania macicy) powodują, że unika Pani lub ogranicza swoją aktywność seksualną?

- 1  wcale
- 2  trochę
- 3  znacznie
- 4  bardzo

**Pytanie 4.** Dla każdego z poniższych, proszę zaznaczyć krzyżykiem na osi liczbę, która najlepiej pokazuje jaką ma Pani opinię na temat swojego życia seksualnego.

a. Zadowolona ← 1 — 2 — 3 — 4 — 5 → Niezadowolona

b. Wystarczające ← 1 — 2 — 3 — 4 — 5 → Niewystarczające

**Pytanie 5.** Do jakiego stopnia się Pani zgadza lub nie zgadza z każdą z poniższych opinii:

|                                                                                                                           | Zdecydowanie się zgadzam   | Raczej się zgadzam         | Raczej się <u>nie</u> zgadzam | Zdecydowanie się <u>nie</u> zgadzam |
|---------------------------------------------------------------------------------------------------------------------------|----------------------------|----------------------------|-------------------------------|-------------------------------------|
| a. Czuję się sfrustrowana moim życiem seksualnym                                                                          | <input type="checkbox"/> 1 | <input type="checkbox"/> 2 | <input type="checkbox"/> 3    | <input type="checkbox"/> 4          |
| b. Czuję się seksualnie gorsza z powodu moich problemów z nietrzymaniem i/lub obniżeniem narządów płciowych               | <input type="checkbox"/> 1 | <input type="checkbox"/> 2 | <input type="checkbox"/> 3    | <input type="checkbox"/> 4          |
| c. Czuję się rozgniewana z powodu wpływu, jaki nietrzymanie i/lub obniżenie narządów płciowych ma na moje życie seksualne | <input type="checkbox"/> 1 | <input type="checkbox"/> 2 | <input type="checkbox"/> 3    | <input type="checkbox"/> 4          |

**Pytanie 6.** Jak bardzo przeszkadza Pani brak aktywności seksualnej?

- 1  wcale
- 2  trochę
- 3  znacznie
- 4  bardzo

**Koniec pytań dla nieaktywnych seksualnie**

## SEKCJA 2: AKTYWNOŚĆ SEKSUALNA

Pozostałe pytania w kwestionariuszu dotyczą tematów rzadko poruszanych w ankietach.

Pani odpowiedzi pozostaną poufne. Proszę odpowiedzieć na nie tak rzetelnie i szczerze jak tylko Pani może.

**Pytanie 7.** Jak często odczuwa Pani pobudzenie seksualne (fizyczne lub psychiczne podniecenie) podczas aktywności seksualnej?

- 1  nigdy
- 2  rzadko
- 3  czasami
- 4  zazwyczaj
- 5  zawsze

**Pytanie 8.** Podczas angażowania się w czynności seksualne, jak często odczuwa Pani poniższe:

|                  | nigdy                      | rzadko                     | czasami                    | zazwyczaj                  | prawie<br>zawsze           |
|------------------|----------------------------|----------------------------|----------------------------|----------------------------|----------------------------|
| a. Spełnienie    | <input type="checkbox"/> 1 | <input type="checkbox"/> 2 | <input type="checkbox"/> 3 | <input type="checkbox"/> 4 | <input type="checkbox"/> 5 |
| b. Zawstydzienie | <input type="checkbox"/> 1 | <input type="checkbox"/> 2 | <input type="checkbox"/> 3 | <input type="checkbox"/> 4 | <input type="checkbox"/> 5 |
| c. Strach        | <input type="checkbox"/> 1 | <input type="checkbox"/> 2 | <input type="checkbox"/> 3 | <input type="checkbox"/> 4 | <input type="checkbox"/> 5 |

**Pytanie 9.** Jak często zdarza się Pani popuścić mocz i/lub stolec podczas wykonywania jakichkolwiek czynności seksualnych?

- 1  nigdy
- 2  rzadko
- 3  czasami
- 4  zazwyczaj
- 5  zawsze

**Pytanie 10.** W porównaniu do orgazmów które miała Pani w przeszłości, jak intensywne są Pani obecne orgazmy?

- 1  zdecydowanie mniej intensywne
- 2  mniej intensywne
- 3  taka sama intensywność
- 4  bardziej intensywne
- 5  zdecydowanie bardziej intensywne

**Pytanie 11.** Jak często odczuwa Pani ból podczas stosunku płciowego? (Jeśli nie miewa Pani stosunków, proszę zaznaczyć tę rubrykę  i przejść do następnego pytania).

- 1  nigdy
- 2  rzadko
- 3  czasami
- 4  zazwyczaj
- 5  zawsze

**Pytanie 12.** Czy ma Pani partnera seksualnego?

- 1  TAK proszę przejść do Pytania 13
- 2  NIE proszę przejść do Pytania 15

**Pytanie 13.** Jak często Pani partner ma problemy (brak podniecenia, pożądania, erekcji, etc.), które ograniczają Pani aktywność seksualną?

- 1  cały czas
- 2  przez większość czasu
- 3  czasami
- 4  prawie nigdy/rzadko

**Pytanie 14.** Czy w Pani ogólnym odczuciu, Pani partner ma pozytywny czy negatywny wpływ na każde z poniższych:

|                                             | Bardzo<br>pozytywny        | Raczej<br>pozytywny        | Raczej<br>negatywny        | Bardzo<br>negatywny        |
|---------------------------------------------|----------------------------|----------------------------|----------------------------|----------------------------|
| a. Pani pożądanie seksualne                 | <input type="checkbox"/> 1 | <input type="checkbox"/> 2 | <input type="checkbox"/> 3 | <input type="checkbox"/> 4 |
| b. Częstotliwość Pani aktywności seksualnej | <input type="checkbox"/> 1 | <input type="checkbox"/> 2 | <input type="checkbox"/> 3 | <input type="checkbox"/> 4 |

**Pytanie 15.** Kiedy jest Pani w trakcie wykonywania czynności seksualnych, jak często czuje Pani, że chciałaby więcej?

- 1  nigdy
- 2  rzadko
- 3  czasami
- 4  zazwyczaj
- 5  zawsze

**Pytanie 16.** Jak często odczuwa Pani pożądanie seksualne, włączając w to ochotę na uprawianie seksu, myśli i fantazje seksualne, etc.?

- 1  codziennie
- 2  raz w tygodniu
- 3  raz w miesiącu
- 4  rzadziej niż raz w miesiącu
- 5  nigdy

**Pytanie 17.** Jak oceniłaby Pani swój poziom (stopień) pożądania lub zainteresowania seksualnego?

- 1  bardzo wysoki
- 2  wysoki
- 3  umiarkowany
- 4  niski
- 5  bardzo niski lub zerowy

**Pytanie 18.** Do jakiego stopnia obawa przed nietrzymaniem moczu, stolca i/lub „wybrzuszeniem” w pochwie (obniżenie narządów płciowych) powoduje, że unika Pani aktywności seksualnej?

- 1  wcale
- 2  trochę
- 3  znacznie
- 4  bardzo

**Pytanie 19.** Dla każdego z poniższych, proszę zaznaczyć krzyżykiem na osi liczbę, która najlepiej pokazuje jaką ma Pani **opinię na temat swojego życia seksualnego**.

- a. Zadowolona  Niezadowolona
- b. Wystarczające  Niewystarczające
- c. Pewna siebie  Niepewna siebie

**Pytanie 20.** Do jakiego stopnia się Pani zgadza lub nie zgadza z każdą z poniższych opinii:

|                                                                                                                           | Zdecydowanie się zgadzam   | Raczej się zgadzam         | Raczej się <u>nie</u> zgadzam | Zdecydowanie się <u>nie</u> zgadzam |
|---------------------------------------------------------------------------------------------------------------------------|----------------------------|----------------------------|-------------------------------|-------------------------------------|
| a. Czuję się sfrustrowana moim życiem seksualnym                                                                          | <input type="checkbox"/> 1 | <input type="checkbox"/> 2 | <input type="checkbox"/> 3    | <input type="checkbox"/> 4          |
| b. Czuję się seksualnie gorsza z powodu moich problemów z nietrzymaniem i/lub obniżeniem narządów płciowych               | <input type="checkbox"/> 1 | <input type="checkbox"/> 2 | <input type="checkbox"/> 3    | <input type="checkbox"/> 4          |
| c. Czuję się zażenowana moim życiem seksualnym                                                                            | <input type="checkbox"/> 1 | <input type="checkbox"/> 2 | <input type="checkbox"/> 3    | <input type="checkbox"/> 4          |
| d. Czuję się rozgniewana z powodu wpływu, jaki nietrzymanie i/lub obniżenie narządów płciowych ma na moje życie seksualne | <input type="checkbox"/> 1 | <input type="checkbox"/> 2 | <input type="checkbox"/> 3    | <input type="checkbox"/> 4          |
